# Supplementary material
Source: PubMed Central journal article supplement (PMC5791885)
Supplement: NIHMS75365-supplement-Supplementary_table_1.pdf [file NIHMS75365-supplement-Supplementary_table_1.pdf]

**Supplementary Table S1**

| Oligos                                             | Sequence                          | Reference (if any) |
|----------------------------------------------------|-----------------------------------|--------------------|
| siRNA scramble (control)                           | cguacgcggaauacuucgatt             | Dardenne et al.    |
| siRNA against macroH2A1.1_1                        | cgacaaacacugacuucuatt,            | Dardenne et al.    |
| siRNA against macroH2A1.1_2                        | ccgacaaaacacugacuucutt            | Dardenne et al.    |
| siRNA against macroH2A1.2_1                        | gcuuugagguggaggccautt             | Dardenne et al.    |
| siRNA against macroH2A1.2_2                        | ugacauugaccuuaaagautt             | Dardenne et al.    |
| siRNA against PARP1_1                              | agctgaagaaagcgtgttctt             |                    |
| siRNA against PARP1_2                              | aggcgtggcaggcaaaggctt             |                    |
| siRNA against NMNAT3_1                             | SASI_Mm01_00194519<br>(start:971) |                    |
| siRNA against NMNAT3_2                             | SASI_Mm01_00194520<br>(start:443) |                    |
| qPCR Primer for mouse macroH2A1 forward            | gacggtgaaaaactgcttgg              |                    |
| qPCR Primer for mouse macroH2A1 reverse            | ggaggaggacatcgtggag               |                    |
| qPCR Primer for mouse macroH2A2 forward            | gctggaagagaccatcaaaaa             |                    |
| qPCR Primer for mouse macroH2A2 reverse            | cgaagtgagccgagatgg                |                    |
| qPCR Primer for mouse macroH2A1 Exon 5 forward     | cctacagacggcttactgtc              | Dardenne et al.    |
| qPCR Primer for mouse macroH2A1.2 Exon 6 reverse   | ggtcaatgtcagcattgtagg             | Dardenne et al.    |
| qPCR Primer for mouse macroH2A1.1 Exon 7 reverse   | gtgtagaagtcagtgtttgtcg            | Dardenne et al.    |
| qPCR Primer for human macroH2A1 Exon 9 reverse     | gagttccaggacagctccac              | Dardenne et al.    |
| qPCR Primer for human macroH2A1.2 Exon 6/7 forward | tccttgccagaagctgaac               | Dardenne et al.    |
| qPCR Primer for human macroH2A1.1 Exon 8 forward   | ttcaccgacaaacactgac               | Dardenne et al.    |
| qPCR Primer for human macroH2A1 forward            | cctggctgatgataagaagctg            |                    |
| qPCR Primer for human macroH2A1 reverse            | gacacgaagtaactggagatgg            |                    |
| qPCR Primer for human macroH2A2 forward            | catggcggcagtcattgag               |                    |
| qPCR Primer for human macroH2A2 reverse            | attgccggccaattctagaa              |                    |
| qPCR Primer for mouse Myog forward                 | ggtgtgtaagaggaagtctgtg            |                    |
| qPCR Primer for mouse Myog reverse                 | taggcgctcaatgtactggat             |                    |
| qPCR Primer for human MYOG forward                 | cagctccctcaaccaggag               |                    |
| qPCR Primer for human MYOG reverse                 | cactgccccactctggac                |                    |
| qPCR Primer for mouse Ckm forward                  | accacagacaagcataagaccga           |                    |
| qPCR Primer for mouse Ckm reverse                  | aggcagagtgtaaccttgatgct           |                    |
| qPCR Primer for human CKM forward                  | ctgacaagcacaagactgacc             |                    |
| qPCR Primer for human CKM reverse                  | ctgctgagcacgtagttaggg             |                    |
| qPCR Primer for mouse Rpl7 forward                 | gaagctcatctatgagaaggc             |                    |
| qPCR Primer for mouse Rpl7 reverse                 | aagacgaaggagctgcagaac             |                    |
| qPCR Primer for mouse Gapdh forward                | tgcaccaccaactgcttag               |                    |
| qPCR Primer for mouse Gapdh reverse                | gatgcagggatgatgttc                |                    |
| qPCR Primer for human/mouse RPL0 forward           | ttcattgtgggagcagac                |                    |
| qPCR Primer for human/mouse RPL0 reverse           | cagcagtttctccagac                 |                    |
| qPCR Primer for mouse Mstn forward                 | cgctaccacggaacaatc                |                    |
| qPCR Primer for mouse Mstn reverse                 | aaagcaacatttgggcttg               |                    |
| qPCR Primer for mouse Tmem171 forward              | aaaccaccttctattccag               |                    |
| qPCR Primer for mouse Tmem171 reverse              | atgaaccctgccagaaatg               |                    |
| qPCR Primer for mouse Itga11 forward               | gggaaacctgtggctgac                |                    |

|                                       |                       |              |
|---------------------------------------|-----------------------|--------------|
| qPCR Primer for mouse Itga11 reverse  | atgaaggggctgtggaac    |              |
| qPCR Primer for mouse Chdr1 forward   | tacagagcgtccaggaaaag  |              |
| qPCR Primer for mouse Chdr1 reverse   | ttgttaggctcctctgcatc  |              |
| qPCR Primer for mouse Coxvb forward   | agcagcacagaagggactg   |              |
| qPCR Primer for mouse Coxvb reverse   | tggacgggactagattaggg  |              |
| qPCR Primer for mouse Cytc forward    | caaatctccacggctgttc   |              |
| qPCR Primer for mouse Cytc reverse    | tccatcagggtatcctctcc  |              |
| qPCR Primer for mouse Cpt1b forward   | ttgtacaaccctgacgatg   |              |
| qPCR Primer for mouse Cpt1b reverse   | tgcaggagataagggtgaaag |              |
| qPCR Primer for mouse Acadm forward   | atttggaagccgacacc     |              |
| qPCR Primer for mouse Acadm reverse   | ttccttaggcactctgacg   |              |
| qPCR Primer for mouse Cd36 forward    | gcaaagaacagcagcaaaatc |              |
| qPCR Primer for mouse Cd36 reverse    | cggggctctgagttatatttc |              |
| qPCR Primer for mouse Ucp2 forward    | agttctacaccaagggtcag  |              |
| qPCR Primer for mouse Ucp2 reverse    | aagcggacctttaccacatc  |              |
| qPCR Primer for mouse Cs forward      | ggagccaagaactcatcctg  |              |
| qPCR Primer for mouse Cs reverse      | tctggcctgctccttaggta  |              |
| qPCR Primer for mouse Fabp3 forward   | gacagcagatgaccggaag   |              |
| qPCR Primer for mouse Fabp3 reverse   | gtgtctcctgcccgttc     |              |
| qPCR Primer for mouse Sdha forward    | ctgatggaaaatggggagtg  |              |
| qPCR Primer for mouse Sdha reverse    | tgaagtaggttcgcccgtag  |              |
| qPCR Primer for mouse Ndufa9 forward  | aaggaagctgggggtgagag  |              |
| qPCR Primer for mouse Ndufa9 reverse  | tggcttcaggaaacacacttc |              |
| qPCR Primer for mouse Atp5a1 forward  | ccctcggaatgctattgatg  |              |
| qPCR Primer for mouse Atp5a1 reverse  | taattccaggggcttccagg  |              |
| qPCR Primer for mouse Cox4i1 forward  | gagcctgattggcaagagag  |              |
| qPCR Primer for mouse Cox4i1 reverse  | atcagcgtaagtggggaaag  |              |
| qPCR Primer for mouse Uqcrc2 forward  | gttcgccgttggaagtag    |              |
| qPCR Primer for mouse Uqcrc2 reverse  | agccaaggcattctgtagg   |              |
| qPCR Primer for mouse Slc2a1 forward  | tgagttcggctataaactg   |              |
| qPCR Primer for mouse Slc2a1 reverse  | gagtggttgatgggatg     |              |
| qPCR Primer for mouse Slc2a4 forward  | gcaccctcactacgctctg   |              |
| qPCR Primer for mouse Slc2a4 reverse  | gccagcatagcccttttc    |              |
| qPCR Primer for mouse Hk2 forward     | ggcggatcaaagagaacaag  |              |
| qPCR Primer for mouse Hk2 reverse     | agcctcctcactgccttatg  |              |
| qPCR Primer for mouse Pdhe1a forward  | ggttgtgctaaagggaaagg  |              |
| qPCR Primer for mouse Pdhe1a reverse  | caccatcgccgtataatgtc  |              |
| qPCR Primer for mouse Pdk4 forward    | aaagatgctctgcgaccag   |              |
| qPCR Primer for mouse Pdk4 reverse    | cacaatgtggattggttg    |              |
| qPCR Primer for mouse Igf1 forward    | tggtgatgctcttcagttc   |              |
| qPCR Primer for mouse Igf1 reverse    | cacaatgcctgtctgaggtg  |              |
| qPCR Primer for mouse Nampt forward   | ccgccacagatctgttctt   | Canto et al. |
| qPCR Primer for mouse Nampt reverse   | agtggccacaaattccagaga | Canto et al. |
| qPCR Primer for mouse Nmnat-1 forward | aggagtgggtggagactgtg  | Canto et al. |
| qPCR Primer for mouse Nmnat-1 reverse | cagtgacaggtgagctttgtg | Canto et al. |
| qPCR Primer for mouse Nmnat-2 forward | aaggtgggagaaagcctcag  | Canto et al. |
| qPCR Primer for mouse Nmnat-2 reverse | ctctcataccgcatcactg   | Canto et al. |
| qPCR Primer for mouse Nmnat-3 forward | cagatcctcagcccagatg   |              |
| qPCR Primer for mouse Nmnat-3 reverse | gaaggtctgaggacatcagc  |              |
| qPCR Primer for mouse Parp-1 forward  | cctgaacaacgcagacagc   |              |
| qPCR Primer for mouse Parp-1 reverse  | cgttgtcgtggttagcatga  |              |
| qPCR Primer for mouse Parp-2 forward  | ggaaggcgagtgctaaatgaa |              |
| qPCR Primer for mouse Parp-2 reverse  | ggaaggcgagtgctaaatgaa |              |

|                                                                  |                                                            |  |
|------------------------------------------------------------------|------------------------------------------------------------|--|
| qPCR Primer for genomic mouse Ndufv1 forward                     | cttccccactggcctcaag                                        |  |
| qPCR Primer for genomic mouse Ndufv1 reverse                     | ccaaaaccagtgatccagc                                        |  |
| qPCR Primer for mitochondrial mouse Nd2 forward                  | agggatcccactgcacatag                                       |  |
| qPCR Primer for mitochondrial mouse Nd2 reverse                  | ctcctcatgcccctatgaaa                                       |  |
| qPCR Primer for human HPRT1 forward                              | tggacaggactgaacgtctg                                       |  |
| qPCR Primer for human HPRT1 reverse                              | ccagcaggtcagcaaagaatt                                      |  |
| RFLP Primers for human MH2A1 Exon 6 forward                      | gcttcacagtcctcctccacc                                      |  |
| RFLP Primers for human MH2A1 Exon 9 reverse                      | gagttccaggacagctccac                                       |  |
| RFLP Primers for mouse Mh2a1 Exon 5 forward                      | cctacagacggcttactgtc                                       |  |
| RFLP Primers for mouse Mh2a1 Exon 8 reverse                      | cgcccttcttccagtggtg                                        |  |
| Mutagenesis Primers for mouse mH2A1.1 silent_mut_887/890_forward | gtgatgctgtcgttcacccgaccaataactga<br>cttctacaccggtgg        |  |
| Mutagenesis Primers for mouse mH2A1.1 silent_mut_887/890_reverse | ccaccggtgtagaagttagtattggtcggg<br>tgaacgacagcatcac         |  |
| Mutagenesis Primers for mouse mH2A1.1 silent_mut_893/896_forward | ctgtcgttcacccgaccaatacggatttcta<br>caccggtggtgaagt         |  |
| Mutagenesis Primers for mouse mH2A1.1 silent_mut_893/896_reverse | acttcaccaccggtgtagaaatccgtattg<br>gtcgggtgaacgacag         |  |
| Mutagenesis Primers for mouse mH2A1.1 silent_GGT667GAG_forward   | ccgaccaatacggatttctacaccggtgag<br>gaagtaggaaacacactggagaag |  |
| Mutagenesis Primers for mouse mH2A1.1 silent_GGT667GAG_reverse   | cttctccagtgtgttctactcctcaccggt<br>gtagaaatccgtattggtcgg    |  |
| Cloning Primers for mouse mH2A1.1_aa1_EcoRI_forward              | gcgaattccatgctcgagccgcgcgggga<br>agaag                     |  |
| Cloning Primers for mouse mH2A1.1_STOP_XhoI_reverse              | ggctcgag<br>tcagcctagtggcgtccagcttgg                       |  |

### Supplemental References

1. Dardenne, E. *et al.* Splicing switch of an epigenetic regulator by RNA helicases promotes tumor-cell invasiveness. *Nature Structural & Molecular Biology* **19**, 1139–1146 (2012).
2. Cantó, C. *et al.* AMPK regulates energy expenditure by modulating NAD<sup>+</sup> metabolism and SIRT1 activity. *Nature* **458**, 1056–1060 (2009).
